# Supplementary material for: Selective hydrogenolysis of 5-hydroxymethylfurfural to 2,5-dimethylfuran with high yield over bimetallic Ru–Co/AC catalysts
Source: Royal Society of Chemistry journal article supplement (doi:10.1039/d4ra02054e), 2024-01-01
Supplement: d4ra02054e1.pdf [file d4ra02054e1.pdf]

## **Supporting Information**

### **Selective Hydrogenolysis of 5-Hydroxymethylfurfural to 2,5-Dimethylfuran with high yield over Bimetallic Ru-Co/AC Catalysts**

**Table S1** Physical property of 5%Ru-1%Co/AC catalyst.

| Entry | Catalyst     | $S_{\text{BET}}(\text{m}^2/\text{g})$ | $V_{\text{p}}(\text{cm}^3/\text{g})$ | $d_{\text{p}}(\text{nm})$ |
|-------|--------------|---------------------------------------|--------------------------------------|---------------------------|
| 1     | 5%Ru-1%Co/AC | 1518.5                                | 0.46                                 | 2.38                      |
| 2     | AC           | 1693.2                                | 0.52                                 | 2.40                      |

**Table S2** Elemental contents of the catalysts analyzed by ICP

| Entry | Catalyst       | Content of Ru (wt.%) | Content of Co (wt.%) |
|-------|----------------|----------------------|----------------------|
| 1     | 5%Ru/AC        | 4.30                 | 0                    |
| 2     | 1%Co/AC        | 0                    | 1.00                 |
| 3     | 2.5%Ru-1%Co/AC | 2.14                 | 0.92                 |
| 4     | 5%Ru-0.5%Co/AC | 4.26                 | 0.43                 |
| 5     | 5%Ru-1%Co/AC   | 4.28                 | 0.91                 |
| 6     | 5%Ru-1%Co/AC   | 1.56                 | 0.27                 |
|       | (after 4 runs) |                      |                      |
| 7     | 5%Ru-5%Co/AC   | 4.24                 | 4.11                 |

**Table S3** The effect of HMF concentration on the conversion of HMF to DMF

| Entry | C <sub>HMF</sub> (mg/ml) | C <sub>Catalyst</sub> (mg/ml) | Conv. (%) | Yield (%) | Sel. (%) |
|-------|--------------------------|-------------------------------|-----------|-----------|----------|
| 1     | 22.08                    | 2.5                           | 99.3      | 85.9      | 86.6     |
| 2     | 11.04                    | 1.25                          | 98.7      | 97.9      | 99.2     |

Reaction conditions: THF, 20 mL, 200 °C, 1 MPa, 1.5 h.

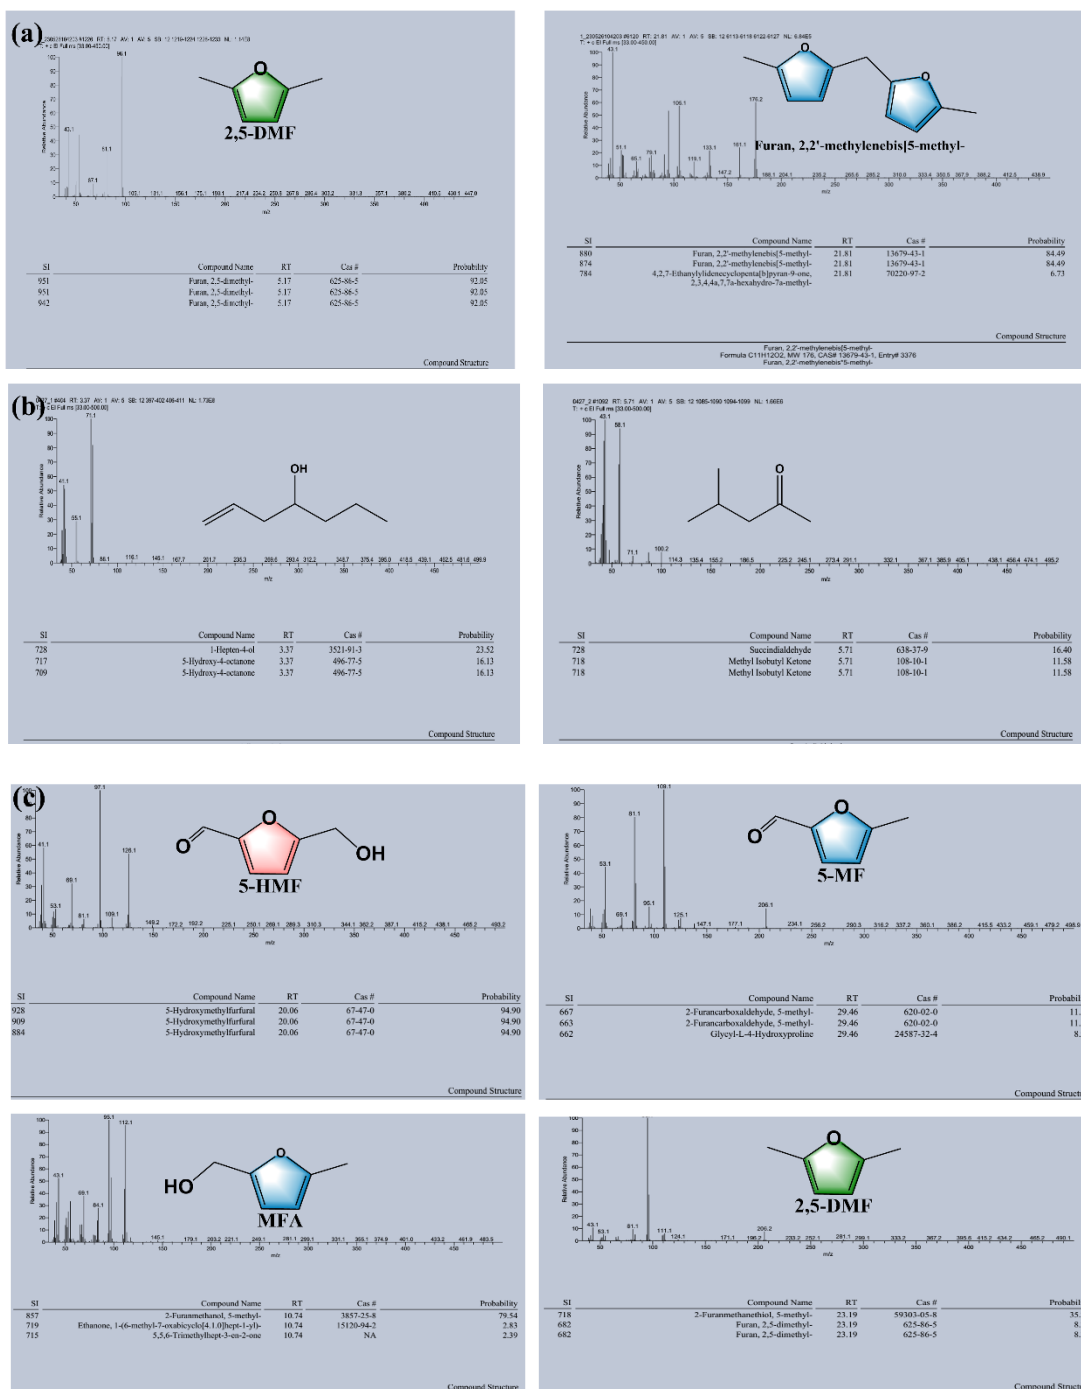

**Fig. S1** GC-MS results of (a) the hydrogenolysis products of HMF over the catalysts

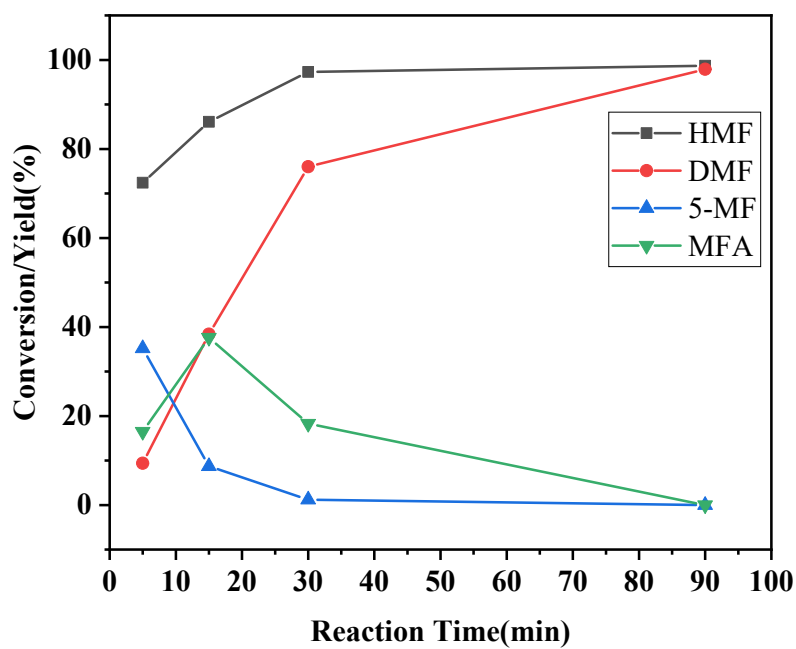

**Fig. S2** The evolution of HMF and its products with the reaction time over 5%Ru-1%Co/AC catalyst

Reaction conditions: catalyst, 25 mg, HMF, 1.25 wt% relative to THF; THF, 20 mL.200 °C,1 MPa

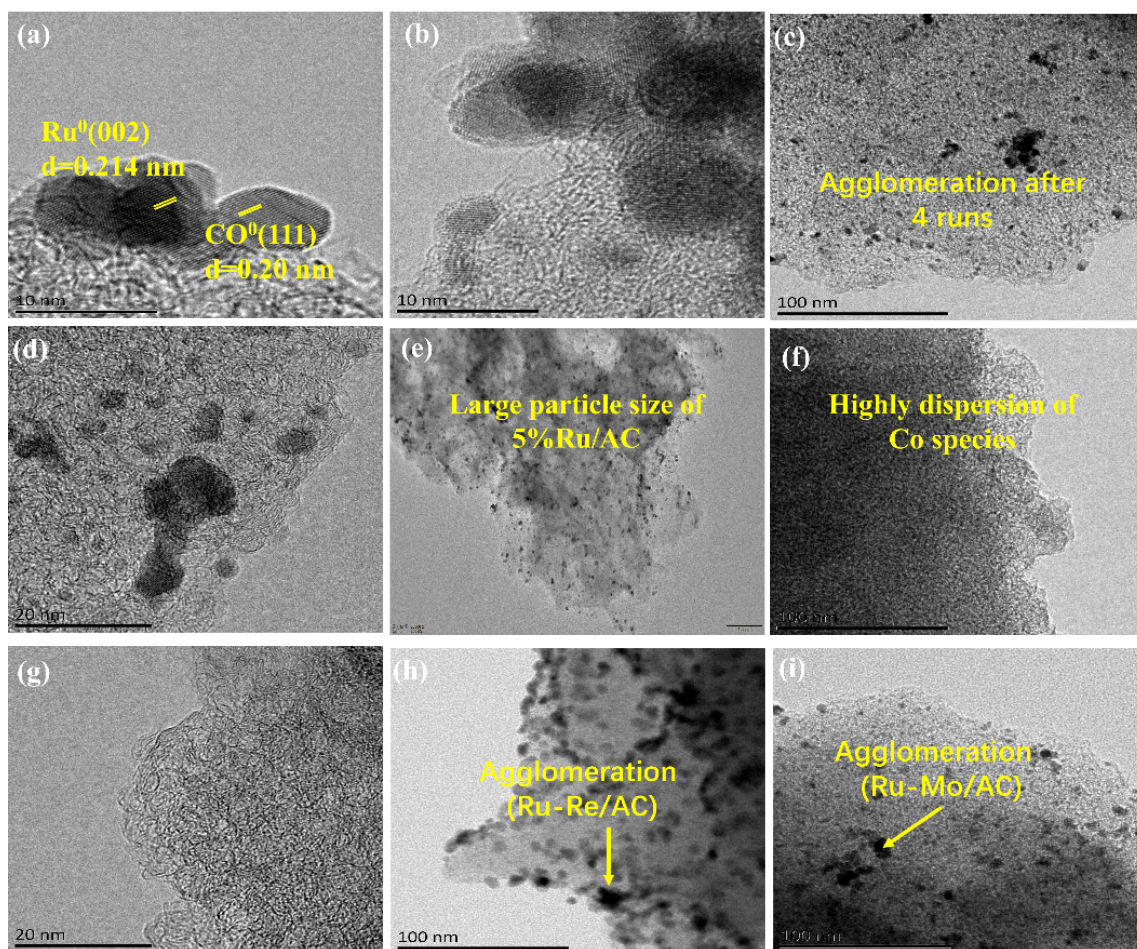

**Fig. S3** TEM images of (a, b) 5%Ru-1%Co/AC, (c, d) 5%Ru-1%Co/AC (after 4 runs), (e)5%Ru/AC, ( f,g) 1%Co/AC, (h) 5%Ru-1%Re/AC, and (i) 5%Ru-1%Mo/AC

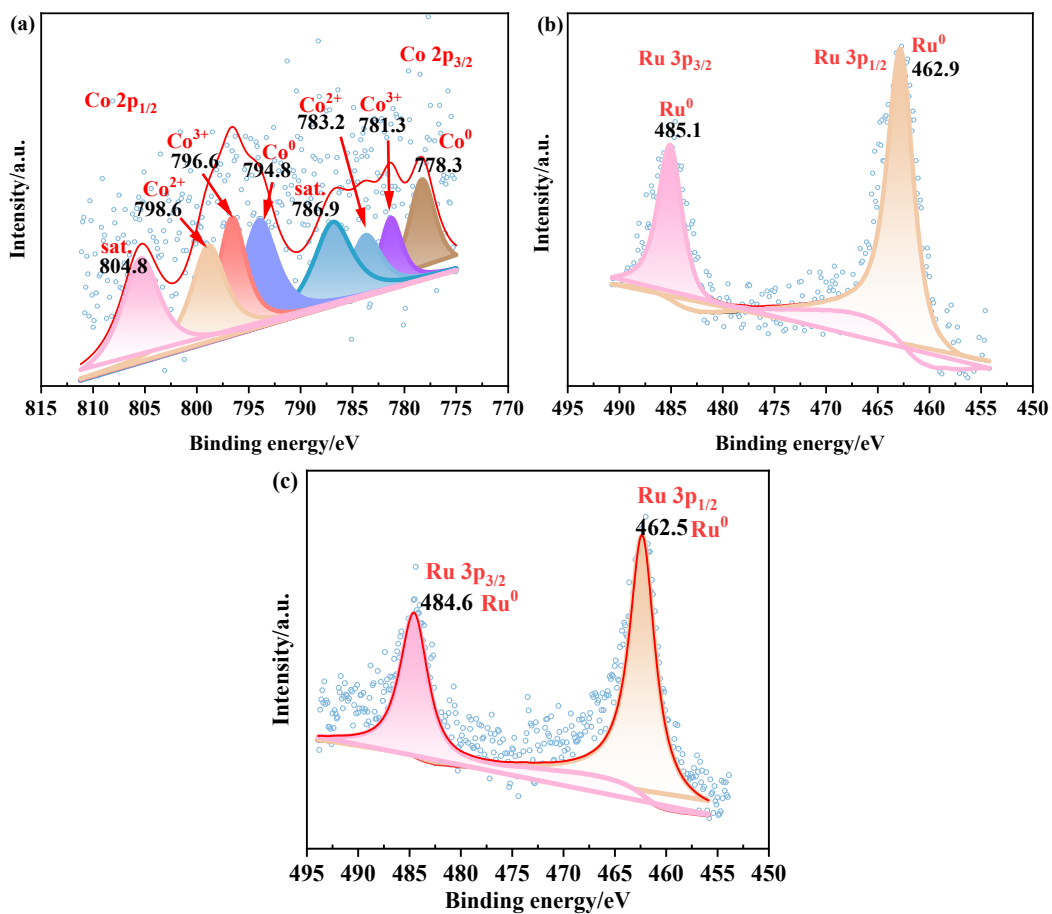

Fig. S4 (a) Co 2p XPS of 5%Ru-1%Co/AC-C-300, (b) Ru 3p XPS of 5%Ru-1%Co/AC-400, and  
(c) Ru 3p XPS of 5%Ru-1%Co/AC-200



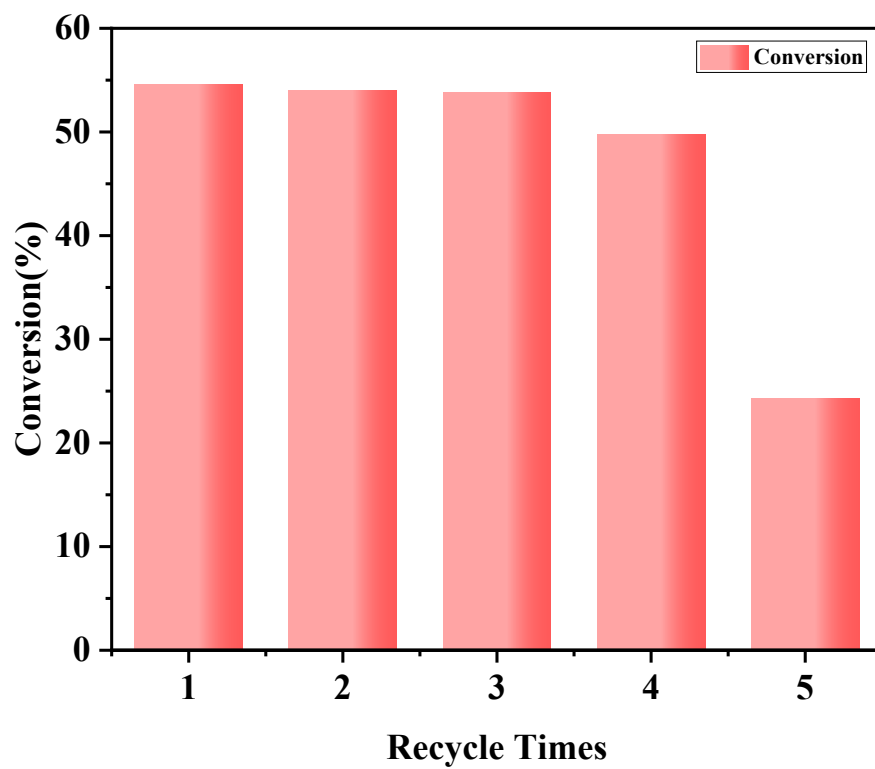

**Fig. S5** Recyclability and reusability of 5%Ru-1%Co/AC

Reaction conditions : catalyst, 25 mg; HMF, 1.25 wt% relative to THF; THF, 20 mL, 80

°C, 0.25 MPa, 0.5 h
